# Supplementary material for: Cortisol Reactivity to Acute Psychosocial Stress in Physician Burnout
Source: MDPI journal article supplement (doi:10.3390/biomedicines12020335), 2024-02-01
Supplement: s1 [file s1]

## Supplements

**Table S1.** Study Overview.

| Authors and Year of Publication | Sample<br>(Number and Characteristics)                        | Burnout<br>Operationalization                     | Stress Test                                                                           | Cortisol-Biomarkers | Measurement Time                                         | Controlled Variables                                                                                                                                                              | Results                                                                                                                                                              |
|---------------------------------|---------------------------------------------------------------|---------------------------------------------------|---------------------------------------------------------------------------------------|---------------------|----------------------------------------------------------|-----------------------------------------------------------------------------------------------------------------------------------------------------------------------------------|----------------------------------------------------------------------------------------------------------------------------------------------------------------------|
| De Vente et al., 2015           | Burnout: 55 (M=34, F=21)<br>Healthy Controls: 40 (M=16, F=24) | Maslach Burnout Inventory-General Survey (MBI-GS) | acute psychosocial (speech preparation task, mental arithmetic task, and speech task) | Saliva cortisol     | -4min, +5min, +20min, +35min, +50min                     | Effect modification and stratification for gender; age and BMI as covariates; additionally menstrual phase, oral contraceptive use and menopausal status as covariates for women. | In Male patients, cortisol reactivity was lower than in healthy males. In female patients a tendency for lower basal cortisol was found compared to healthy females. |
| De Vente et al., 2003           | Burnout: 23<br>Healthy Controls: 23                           | Maslach Burnout Inventory-General Survey (MBI-GS) | adapted version of the Trier Social Stress Test (TSST)                                | Saliva cortisol     | Laboratory session: -4min, +5min, +19min, +33min, +47min | Age and gender as covariates                                                                                                                                                      | Basal cortisol levels, cortisol reactivity were similar for burnout patients and healthy controls. Burnout                                                           |

|                      |                                                                                                                                                                                                                                                                   |                                             |                                                                 |                 |                                                                                                                      |                                                                                                                           |                                                                                                                                                                                                                                                                                   |
|----------------------|-------------------------------------------------------------------------------------------------------------------------------------------------------------------------------------------------------------------------------------------------------------------|---------------------------------------------|-----------------------------------------------------------------|-----------------|----------------------------------------------------------------------------------------------------------------------|---------------------------------------------------------------------------------------------------------------------------|-----------------------------------------------------------------------------------------------------------------------------------------------------------------------------------------------------------------------------------------------------------------------------------|
|                      |                                                                                                                                                                                                                                                                   |                                             |                                                                 |                 | Morning cortisol level on another day: awakening time, 30 and 60mins after awakening, and at 12:00                   |                                                                                                                           | patients showed higher cortisol levels during the first hour after awakening in comparison to healthy controls.                                                                                                                                                                   |
| Jönsson et al., 2015 | <p>Group 1: former patients recovered from work-stress-related exhaustion (n=14)</p> <p>Group 2: participants in pre-stage of exhaustion disorder (experiencing work-related stress in the past six months, but no contact with the healthcare system) (n=17)</p> | Shirom-Melamed Burnout Questionnaire (SMBQ) | Virtual reality version of TSST (V-TSST), twice within one week | Saliva cortisol | Twice before the V-TSST (baseline and preparation phase); initially after V-TSST; +10, +20, +30, +40min after V-TSST | Age, gender and the three subscales of Symptom Checklist-90 (SCL-90 – Somatization, Depression and Anxiety) as covariates | <p>Cortisol increased during the V-TSST and decreased afterwards during the recovery phase.</p> <p>The cortisol was lower during the second session on another day.</p> <p>Lower SMBQ ratings were associated with stronger cortisol responses than with higher SMBQ ratings.</p> |

|                             |                                                                                                      |                                                        |                                                    |                                      |                                                                                                                         |                    |                                                                                                                                                                                                               |
|-----------------------------|------------------------------------------------------------------------------------------------------|--------------------------------------------------------|----------------------------------------------------|--------------------------------------|-------------------------------------------------------------------------------------------------------------------------|--------------------|---------------------------------------------------------------------------------------------------------------------------------------------------------------------------------------------------------------|
|                             | Group3: Control<br>Group, no<br>experience of work<br>stress in the past six<br>months (n=20)        |                                                        |                                                    |                                      |                                                                                                                         |                    | In Men the cortisol<br>response to the V-<br>TSST was higher<br>than in women, men<br>generally had<br>higher cortisol<br>levels.                                                                             |
| Lennartsson et al.,<br>2015 | 19 patients (9 men,<br>10 women); 37<br>healthy subjects (20<br>men, 17 women)                       | Shirom-Melamed<br>Burnout<br>Questionnaire<br>(SMBQ)   | Trier Social Stress<br>Test (TSST)                 | Blood samples and<br>saliva cortisol | Blood sample: -10, 0, -<br>+20, +30, +40,<br>+50min<br><br>Saliva sample: -10,<br>0, +10, +20, +30, +40,<br>+50, +60min |                    | In patients and<br>healthy controls<br>higher levels of<br>cortisol after the<br>TSST were<br>observed. Patients<br>with higher burnout<br>scores had lower<br>saliva cortisol<br>responses than<br>controls. |
| Wekenborg et al.,<br>2019   | 71 employed male<br>participants with<br>varying severity of<br>burnout symptoms<br>randomized in to | German Version of<br>the Maslach<br>Burnout Inventory- | Trier Social Stress<br>Test for Groups<br>(TSST-G) | Hair cortisol and<br>saliva cortisol | -40min, -1min,<br>+12min, +25min,<br>+35min, +45min,<br>+60min, +85min                                                  | Controlled for age | Burnout and hair<br>cortisol levels were<br>associated with<br>reduced<br>cardiovascular                                                                                                                      |

|                          |                                                                                                                                            |                                                                      |   |                |                                                                                                                                                                       |                                                                                                                                                                                                                            |                                                                                                                                                     |
|--------------------------|--------------------------------------------------------------------------------------------------------------------------------------------|----------------------------------------------------------------------|---|----------------|-----------------------------------------------------------------------------------------------------------------------------------------------------------------------|----------------------------------------------------------------------------------------------------------------------------------------------------------------------------------------------------------------------------|-----------------------------------------------------------------------------------------------------------------------------------------------------|
|                          | stress condition<br>(n=35) and control<br>condition (n=35)                                                                                 | General Survey<br>(MBI-GS)                                           |   |                |                                                                                                                                                                       |                                                                                                                                                                                                                            | reactivity, with the<br>timing of this<br>impact varying.                                                                                           |
| Penz et al., 2019        | N = 150, participants<br>living near the city<br>of Dresden in<br>Germany, data from<br>the prospective<br>cohort Dresden<br>Burnout Study | Work stress, Effort-<br>Reward Imbalance<br>(ERI)                    | - | Hair cortisol  | Once at baseline<br>and follow up                                                                                                                                     | Sex, age, body mass<br>index (BMI),<br>medication, time<br>interval (between<br>baseline and follow<br>up)                                                                                                                 | Reduced cortisol<br>levels in individuals<br>with higher work-<br>related stress after a<br>two-year period.                                        |
| Marchand et al.,<br>2014 | Day shift workers<br>(N=401), in 34<br>diverse Canadian<br>workplaces                                                                      | Maslach Burnout<br>Inventory 16-item<br>General Survey<br>(MBIGS-16) | - | Saliva Samples | 5 samples a day: at<br>awakening, 30min<br>after awakening,<br>14:00, 16:00,<br>bedtime; for 3 days<br>(one rest day, 2<br>working days) over<br>the course of a week | Adjusted for self-<br>reported time<br>of awakening, sex,<br>age, season of<br>sampling, cigarette<br>smoking, alcohol<br>consumption,<br>physical activity,<br>psychotropic drug<br>use, physical health<br>problems, and | Global burnout and<br>feelings of<br>exhaustion were<br>associated with a<br>higher cortisol<br>awakeing response<br>(CAR) in day shift<br>workers. |

|                     |                                                                 |                                 |                                    |                               |                                                                                                                                                                              | body mass index<br>(BMI)                                                                                                                                                                                           |                                                                                                                                                                                                                 |
|---------------------|-----------------------------------------------------------------|---------------------------------|------------------------------------|-------------------------------|------------------------------------------------------------------------------------------------------------------------------------------------------------------------------|--------------------------------------------------------------------------------------------------------------------------------------------------------------------------------------------------------------------|-----------------------------------------------------------------------------------------------------------------------------------------------------------------------------------------------------------------|
| Lim et al., 2020    | 325 shift fire fighters<br>in Korea                             | Fatigue Severity<br>Scale (FSS) | -                                  | Urinary and serum<br>cortisol | During day, night<br>and every 24h per<br>shift cycle                                                                                                                        | Gender, age,<br>chronotype,<br>depression, job, post<br>traumatic stress<br>disorder, sleep<br>disorder, fatigue,<br>caffeine intake,<br>subjective health<br>condition, and sleep<br>quality                      | Significant changes<br>in urine and serum<br>cortisol in healthy<br>night shift workers<br>compared to non-<br>night shift workers,<br>along with a risk for<br>delayed recovery of<br>the circadian<br>rhythm. |
| Dienes et al., 2019 | 54 female<br>participants,<br>undergraduates<br>(aged 17 to 23) | Life Stress Interview<br>(LSI)  | Trier Social Stress<br>Test (TSST) | Salivary cortisol             | Five weekdays at<br>waking and 30min<br>past waking for<br>cortisol awakening<br>response (CAR);<br>baseline, post TSST,<br>after +10min,<br>+25min and +40min<br>after TSST | Wake time, sleep<br>aggregate (e.g. sleep<br>quality), age,<br>psychological<br>distress aggregate<br>(e.g. depression,<br>anxiety, early<br>adversity severity),<br>menstrual cycle,<br>medication,<br>electronic | Stress test in a<br>laboratory setting<br>was associated with<br>an increased cortisol<br>awakening response<br>(CAR) and cortisol<br>reactivity.                                                               |

medication  
electronic  
monitoring system  
(MEMS)

|                     |                                                                                                                                                                                                                                                     |                                             |   |                   |                                                      |                                                                              |                                                                                                                                            |
|---------------------|-----------------------------------------------------------------------------------------------------------------------------------------------------------------------------------------------------------------------------------------------------|---------------------------------------------|---|-------------------|------------------------------------------------------|------------------------------------------------------------------------------|--------------------------------------------------------------------------------------------------------------------------------------------|
| Grossi et al., 2005 | Three groups with varying levels of burnout scores:<br><br>Group 1: Twenty-two patients on sick leave due to burnout<br><br>Group 2: Twenty-two working participants with low burnout<br><br>Group 3: 20 working participants with moderate burnout | Shirom Melamed Burnout Questionnaire (SMBQ) | - | Salivary cortisol | At awakening, +15min, +30min, +60min after awakening | Antidepressant medication, time of awakening, sleep variables, negative mood | Dysregulation in HPA-axis activity, assessed by cortisol awakening response (CAR), was increased in female patients with moderate burnout. |
|---------------------|-----------------------------------------------------------------------------------------------------------------------------------------------------------------------------------------------------------------------------------------------------|---------------------------------------------|---|-------------------|------------------------------------------------------|------------------------------------------------------------------------------|--------------------------------------------------------------------------------------------------------------------------------------------|
